# Supplementary material for: The first observation of nitrogen–carbonyl bonding: self-assembly of N-oxalyl 2,4-dinitroanilide assisted by a weak N⋯OC interaction
Source: Royal Society of Chemistry journal article supplement (doi:10.1039/b306012h), 2003-01-01
Supplement: b306012h.pdf [file b306012h.pdf]

**The First Observation of Nitrogen-Carbonyl Bonding: Self-Assembly of N-oxalyl  
Dinitroanilide as Assisted by N...O=C Weak Interaction**

Zhenming Yin, Ling Jiang, Jiaqi He, Jin-Pei Cheng \*

**The synthesis and spectroscopic data of 1**

**Scheme 1**

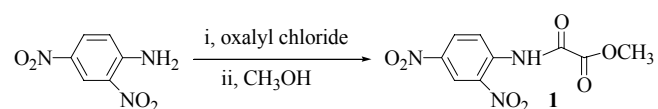

0.378g (3mmol) oxalyl chloride was dissolved in 20 mL CH<sub>2</sub>Cl<sub>2</sub> solution and 0.183g (1mmol) 2,4-Dinitroaniline in 20 mL CH<sub>2</sub>Cl<sub>2</sub> was dripped to the solution. Then methanol was added. The resulted solution was vacuum dried and the residue purified by column chromatography (CHCl<sub>3</sub>) to yield **1** 0.2g, 75% yield. Pale-yellow powder. mp=175~177°C; <sup>1</sup>H NMR (300MHz, CDCl<sub>3</sub>, TMS); δ4.065 (s, 3H, -CH<sub>3</sub>), 8.57 (d, J=9Hz, 1H, ArH), 9.12 (d, J=9Hz, 1H, ArH), 9.21 (s, 1H, ArH), 11.20 (s, 1H, NH); <sup>13</sup>C NMR (75MHz); 54.6, 122.2, 124.7, 130.2, 137, 139.6, 143.6, 155.6, 160.3; FAB-MS: 269 (M<sup>+</sup>), 223 (M-NO<sub>2</sub>), 210 (M-COOCH<sub>3</sub>); Elemental Analysis: C<sub>9</sub>H<sub>7</sub>N<sub>3</sub>O<sub>7</sub>: Calcd: C, 40.16; H, 2.62; N, 15.61. Found: C, 40.22; H, 2.60; N, 15.72.
